# Supplementary material for: Comparative proteomic analysis of cell lines and scrapings of the human intestinal epithelium
Source: PubMed Central journal article supplement (PMC1852558; doi:10.1186/1471-2164-8-91), 2007-04-03
Supplement: 1471-2164-8-91-S1.pdf [file 1471-2164-8-91-S1.pdf]

**Additional file 1 - Detailed protein characteristics of spot numbers indicated in Figure 5.**

| Spot No. | Swiss-Prot Acc. No.  | Protein Name                                        | M <sub>r</sub> (kDa) | pI th. | MAS-COT Score | Seq. Cov. (%) | Nr. of Pept. Searched | Nr. of Pept. Matched | Nr. of Pept. Un-matched |
|----------|----------------------|-----------------------------------------------------|----------------------|--------|---------------|---------------|-----------------------|----------------------|-------------------------|
| 1        | P27797               | Calreticulin                                        | 48                   | 4.29   | 153           | 44            | 27                    | 11                   | 11                      |
| 2        | P07237               | Protein disulfide-isomerase                         | 57                   | 4.76   | 174           | 25            | 21                    | 12                   | 7                       |
| 3        | P11021               | 78 kDa glucose-regulated protein                    | 72                   | 5.07   | 233           | 38            | 44                    | 19                   | 20                      |
| 4        | P07437               | Tubulin beta-2                                      | 50                   | 4.78   | 180           | 32            | 34                    | 12                   | 16                      |
| 5        | P06576               | ATP synthase beta chain, mitochondrial              | 57                   | 5.26   | 237           | 46            | 30                    | 17                   | 7                       |
| 6        | Q15293               | Reticulocalbin-1 precursor                          | 39                   | 4.86   | 82            | 30            | 42                    | 8                    | 32                      |
| 7        | Q15084               | Protein disulfide-isomerase A6                      | 48                   | 4.95   | 148           | 28            | 13                    | 9                    | 3                       |
| 8-1      | P08670               | Vimentin                                            | 54                   | 5.06   | 76            | 16            | 23                    | 8                    | 14                      |
| 8-2      | P05787               | Keratin, type II cytoskeletal 8                     | 54                   | 5.52   | 71            | 19            | 23                    | 9                    | 14                      |
| 9        | P10809               | 60 kDa heat shock protein                           | 61                   | 5.7    | 171           | 46            | 41                    | 14                   | 22                      |
| 10       | P35900               | Keratin, type I cytoskeletal 20                     | 48                   | 5.52   | 206           | 48            | 38                    | 17                   | 17                      |
| 11       | Q9Y2T3               | Guanine deaminase                                   | 51                   | 5.44   | 96            | 35            | 53                    | 13                   | 40                      |
| 12       | P60709               | Beta-actin                                          | 42                   | 5.29   | 106           | 32            | 19                    | 9                    | 10                      |
| 13       | P07237               | Protein disulfide-isomerase                         | 57                   | 4.76   | 157           | 26            | 25                    | 13                   | 11                      |
| 14       | P12277               | Creatine kinase B-type                              | 43                   | 5.34   | 173           | 51            | 50                    | 14                   | 33                      |
| 15       | P31930               | Ubiquinol-cytochrome-c reductase                    | 53                   | 5.94   | 69            | 14            | 26                    | 7                    | 18                      |
| 16       | P35900               | Keratin, type I cytoskeletal 20                     | 48                   | 5.52   | 207           | 47            | 38                    | 16                   | 17                      |
| 17       | P05787               | Keratin, type II cytoskeletal 8                     | 54                   | 5.52   | 125           | 39            | 47                    | 15                   | 26                      |
| 18-1     | P30101               | Protein disulfide-isomerase A3                      | 57                   | 5.98   | 112           | 34            | 58                    | 14                   | 40                      |
| 18-2     | P12955               | Xaa-Pro dipeptidase                                 | 54                   | 5.64   | 83            | 27            | 58                    | 11                   | 45                      |
| 19       | P61978               | Heterogeneous nuclear ribonucleoprotein K           | 51                   | 5.39   | 72            | 18            | 17                    | 6                    | 10                      |
| 20       | P38646               | 75 kDa glucose regulated protein                    | 74                   | 5.87   | 153           | 28            | 22                    | 14                   | 7                       |
| 21       | P02768               | Serum albumin                                       | 69                   | 5.92   | 196           | 29            | 27                    | 18                   | 9                       |
| 22       | P13674               | Prolyl 4-hydroxylase alpha-1                        | 61                   | 5.7    | 72            | 19            | 28                    | 8                    | 19                      |
| 23       | P31040               | Succinate dehydrogenase                             | 73                   | 7.06   | 74            | 21            | 32                    | 10                   | 22                      |
| 24       | P00352               | Retinal dehydrogenase 1                             | 55                   | 6.29   | 112           | 27            | 34                    | 11                   | 21                      |
| 25       | P49411               | Elongation factor Tu                                | 50                   | 7.26   | 97            | 23            | 20                    | 7                    | 11                      |
| 26       | P04181               | Ornithine aminotransferase                          | 49                   | 6.57   | 112           | 24            | 16                    | 8                    | 7                       |
| 27       | P14866               | Heterogeneous nuclear ribonucleoprotein L           | 60                   | 6.65   | 78            | 18            | 26                    | 9                    | 17                      |
| 28       | Q16822               | Phosphoenolpyruvate carboxykinase, mit.             | 71                   | 7.56   | 132           | 24            | 35                    | 13                   | 11                      |
| 29       | P14866               | Heterogeneous nuclear ribonucleoprotein L           | 60                   | 6.65   | 126           | 29            | 38                    | 13                   | 23                      |
| 30       | O60701               | UDP-glucose 6-dehydrogenase                         | 55                   | 6.73   | 119           | 32            | 35                    | 12                   | 22                      |
| 31       | P06733               | Alpha-enolase                                       | 47                   | 6.99   | 97            | 43            | 64                    | 13                   | 47                      |
| 32       | P54868               | Hydroxymethylglutaryl-CoA synthase                  | 57                   | 8.4    | 95            | 33            | 26                    | 10                   | 16                      |
| 33       | P14550               | Alcohol dehydrogenase [NADP+]                       | 36                   | 6.35   | 94            | 31            | 39                    | 9                    | 29                      |
| 34       | Q16762               | Thiosulfate sulfurtransferase                       | 33                   | 6.83   | 69            | 31            | 28                    | 7                    | 21                      |
| 35       | P05062               | Fructose-bisphosphate aldolase B                    | 39                   | 8.06   | 80            | 37            | 37                    | 9                    | 26                      |
| 36       | P05062               | Fructose-bisphosphate aldolase B                    | 39                   | 8.06   | 102           | 36            | 28                    | 9                    | 15                      |
| 37       | P22626               | Heterogeneous nuclear ribonucleoproteins A2/B1      | 37                   | 8.97   | 181           | 46            | 15                    | 12                   | 3                       |
| 38       | P22626               | Heterogeneous nuclear ribonucleoproteins A2/B1      | 37                   | 8.97   | 135           | 35            | 24                    | 11                   | 12                      |
| 39       | P21796               | Voltage-dependent anion-selective channel protein 1 | 31                   | 8.63   | 113           | 42            | 32                    | 8                    | 22                      |
| 40       | P17931 <sup>a)</sup> | Galectin-3                                          | 26                   | 8.6    |               |               |                       |                      |                         |
| 41       | Q13268               | Dehydrogenase/reductase SDR family member 2         | 27                   | 8.9    | 88            | 36            | 41                    | 9                    | 31                      |
| 42       | Q06830               | Peroxioredoxin 1                                    | 22                   | 8.27   | 85            | 35            | 25                    | 6                    | 27                      |

| Spot No. | Swiss-Prot Acc. No.  | Protein Name                                     | Mr (kDa) | pI   | MAS-COT Score | Seq. Cov. (%) | Nr. of Pept. Searched | Nr. of Pept. Matched | Nr. of Pept. Un-matched |
|----------|----------------------|--------------------------------------------------|----------|------|---------------|---------------|-----------------------|----------------------|-------------------------|
| 43       | P28062               | Proteasome subunit beta type 8                   | 30       | 7.63 | 74            | 30            | 38                    | 7                    | 30                      |
| 44       | P30086               | Phosphatidylethanolamine-binding protein         | 21       | 7.43 | 117           | 59            | 40                    | 8                    | 30                      |
| 45       | P00915               | Carbonic anhydrase 1                             | 29       | 6.63 | 103           | 61            | 41                    | 10                   | 28                      |
| 46       | P18669               | Phosphoglycerate mutase                          | 29       | 6.75 | 70            | 37            | 28                    | 7                    | 21                      |
| 47       | P60174               | Triosephosphate isomerase                        | 27       | 6.51 | 230           | 81            | 37                    | 13                   | 20                      |
| 48       | P02768 <sup>b)</sup> | Serum albumin                                    | 69       | 5.92 | 160           | 19            | 12                    | 11                   | 0                       |
| 49-1     | P30039               | MAWD binding protein                             | 33       | 5.64 | 83            | 32            | 31                    | 6                    | 23                      |
| 49-2     | P25786               | Proteasome subunit alpha type 1                  | 30       | 6.15 | 62            | 24            | 31                    | 6                    | 25                      |
| 50       | P50225               | Sulfotransferase 1A1                             | 34       | 6.16 | 92            | 41            | 29                    | 8                    | 20                      |
| 51       | P78417               | Glutathione transferase omega 1                  | 28       | 6.24 | 82            | 37            | 26                    | 8                    | 18                      |
| 52       | P50053               | Ketohexokinase                                   | 33       | 5.64 | 70            | 37            | 30                    | 7                    | 23                      |
| 53       | P30084               | Enoyl-CoA hydratase                              | 31       | 8.34 | 105           | 29            | 11                    | 6                    | 4                       |
| 54       | P04792               | Heat-shock protein beta-1                        | 23       | 5.98 | 78            | 49            | 50                    | 9                    | 41                      |
| 55       | P30048               | Thioredoxin-dependent peroxide reductase         | 28       | 7.68 | 85            | 28            | 21                    | 6                    | 13                      |
| 56       | P02768 <sup>b)</sup> | Serum albumin                                    | 69       | 5.92 | 132           | 15            | 13                    | 10                   | 2                       |
| 57       | Q13162               | Peroxiredoxin 4                                  | 31       | 5.86 | 117           | 51            | 54                    | 10                   | 42                      |
| 58       | P07339               | Cathepsin D precursor                            | 45       | 6.1  | 83            | 26            | 24                    | 7                    | 15                      |
| 59       | P09525               | Annexin A4                                       | 36       | 5.85 | 124           | 35            | 26                    | 11                   | 13                      |
| 60       | P50224               | Monoamine-sulfating phenol sulfotransferase      | 34       | 5.68 | 102           | 40            | 25                    | 9                    | 15                      |
| 61       | P35232               | Prohibitin                                       | 30       | 5.57 | 74            | 28            | 25                    | 7                    | 18                      |
| 62       | P35232               | Prohibitin                                       | 30       | 5.57 | 87            | 38            | 40                    | 8                    | 31                      |
| 63       | P28070               | Proteasome subunit beta type 4                   | 29       | 5.72 | 78            | 39            | 23                    | 7                    | 16                      |
| 64       | P09211               | Glutathione S-transferase P                      | 23       | 5.44 | 91            | 48            | 13                    | 6                    | 7                       |
| 65-1     | P30085               | UMP-CMP kinase                                   | 22       | 5.44 | 97            | 51            | 25                    | 7                    | 17                      |
| 65-2     | P32119               | Peroxiredoxin 2                                  | 22       | 5.67 | 69            | 28            | 25                    | 5                    | 19                      |
| 66       | Q9NRV9               | Heme-binding protein 1                           | 21       | 5.71 | 77            | 41            | 25                    | 6                    | 18                      |
| 67       | P02753               | Plasma retinol-binding protein                   | 23       | 5.76 | 77            | 45            | 37                    | 7                    | 29                      |
| 68       | O75947               | ATP synthase D chain                             | 18       | 5.22 | 71            | 36            | 11                    | 4                    | 6                       |
| 69       | P52565               | Rho GDP-dissociation inhibitor 1                 | 23       | 5.03 | 78            | 25            | 8                     | 4                    | 3                       |
| 70       | P07858 <sup>c)</sup> | Cathepsin B precursor                            | 38       | 5.88 | 69            | 25            | 17                    | 6                    | 10                      |
| 71       | P28066               | Proteasome subunit alpha type 5                  | 26       | 4.74 | 77            | 39            | 29                    | 6                    | 22                      |
| 72       | P31947               | Epithelial cell marker protein 1                 | 28       | 4.68 | 89            | 33            | 38                    | 8                    | 28                      |
| 73       | P15374               | Ubiquitin carboxyl-terminal hydrolase isozyme L3 | 26       | 4.84 | 74            | 28            | 11                    | 5                    | 5                       |
| 74       | P13693               | Translationally-controlled tumor protein         | 20       | 4.84 | 82            | 45            | 23                    | 6                    | 16                      |
| 75       | P28065               | Proteasome subunit beta type 9                   | 23       | 4.93 | 76            | 44            | 20                    | 6                    | 14                      |
| 76       | P07237 <sup>d)</sup> | Protein disulfide-isomerase                      | 57       | 4.76 | 77            | 8             | 5                     | 4                    | 0                       |
| 77       | P07237 <sup>d)</sup> | Protein disulfide-isomerase                      | 57       | 4.76 | 77            | 10            | 5                     | 5                    | 0                       |
| 78       | P62158               | Calmodulin                                       | 17       | 4.09 | 68            | 45            | 15                    | 4                    | 10                      |
| 79       | P60660               | Myosin light polypeptide 6                       | 17       | 4.56 | 74            | 44            | 24                    | 5                    | 18                      |
| 80       | P60660               | Myosin light polypeptide 6                       | 17       | 4.56 | 80            | 34            | 10                    | 4                    | 5                       |
| 81       | P00167               | Cytochrome b5                                    | 15       | 4.88 | 68            | 58            | 11                    | 4                    | 7                       |
| 82       | Q9Y2B0               | MIR-interacting saposin-like protein precursor   | 21       | 4.81 | 69            | 28            | 17                    | 4                    | 10                      |
| 83       | P50120               | Retinol-binding protein II, cellular             | 16       | 5.27 | 84            | 38            | 4                     | 4                    | 0                       |
| 84       | P09382               | Galectin-1                                       | 15       | 5.34 | 70            | 52            | 34                    | 6                    | 28                      |
| 85       | P02766               | Transthyretin                                    | 16       | 5.52 | 82            | 48            | 12                    | 4                    | 7                       |
| 86       | P12104               | Fatty acid-binding protein, intestinal           | 15       | 6.88 | 74            | 45            | 23                    | 5                    | 17                      |
| 87       | P07148               | Fatty acid-binding protein, liver                | 14       | 6.6  | 95            | 74            | 24                    | 6                    | 16                      |
| 88       | P62937               | Peptidyl-prolyl cis-trans isomerase A            | 18       | 7.82 | 82            | 50            | 28                    | 8                    | 19                      |

| Spot No. | Swiss-Prot Acc. No. | Protein Name                          | M <sub>r</sub> (kDa) | pI   | MAS-COT Score | Seq. Cov. (%) | Nr. of Pept. Searched | Nr. of Pept. Matched | Nr. of Pept. Un-matched |
|----------|---------------------|---------------------------------------|----------------------|------|---------------|---------------|-----------------------|----------------------|-------------------------|
| 89       | P62937              | Peptidyl-prolyl cis-trans isomerase A | 18                   | 7.82 | 84            | 60            | 49                    | 6                    | 41                      |
| 90       | P23528              | Cofilin-1                             | 18                   | 8.26 | 88            | 61            | 47                    | 6                    | 39                      |
| 91       | P07737              | Profilin-1                            | 15                   | 8.47 | 73            | 44            | 15                    | 5                    | 10                      |
| 92       | P68871              | Hemoglobin beta                       | 16                   | 6.81 | 215           | 94            | 18                    | 11                   | 6                       |
| 93       | P69905              | Hemoglobin alpha                      | 15                   | 8.73 | 71            | 38            | 7                     | 4                    | 3                       |
| 94       | P61604              | 10 kDa heat shock protein             | 11                   | 8.91 | 99            | 43            | 6                     | 4                    | 1                       |

a) Significant identification in K Lenaerts, et al. *Febs J* 2005, 272:3350-64

b) N-terminus

c) Peptide tolerance set to 120 ppm

d) C-terminus

Seq. cov., Sequence coverage; Nr. of pept., number of peptides
