# Supplementary material for: Comparative proteomic analysis of cell lines and scrapings of the human intestinal epithelium
Source: PubMed Central journal article supplement (PMC1852558; doi:10.1186/1471-2164-8-91), 2007-04-03
Supplement: 1471-2164-8-91-S2.pdf [file 1471-2164-8-91-S2.pdf]

**Additional file 2 - Averaged spot intensities (Av) with standard deviations (St Dev) of identified protein spots which are displayed in Figure 3 and 4.**

| Spot No.         | Small Int. St |     | Large Int. St |     | Caco-2 5d St |     | Caco-2 15d St |     | HT-29 St    |     | Hep G2 St   |     | TE 671 St   |     |
|------------------|---------------|-----|---------------|-----|--------------|-----|---------------|-----|-------------|-----|-------------|-----|-------------|-----|
|                  | Av            | Dev | Av            | Dev | Av           | Dev | Av            | Dev | Av          | Dev | Av          | Dev | Av          | Dev |
| <b>Cluster 1</b> |               |     |               |     |              |     |               |     |             |     |             |     |             |     |
| 92               | 14185 ± 4893  |     | 12648 ± 1898  |     | 0 ± 0        |     | 0 ± 0         |     | 0 ± 0       |     | 0 ± 0       |     | 0 ± 0       |     |
| 93               | 10763 ± 2748  |     | 7592 ± 3876   |     | 0 ± 0        |     | 0 ± 0         |     | 0 ± 0       |     | 0 ± 0       |     | 0 ± 0       |     |
| 21               | 1714 ± 721    |     | 1466 ± 482    |     | 0 ± 0        |     | 0 ± 0         |     | 0 ± 0       |     | 0 ± 0       |     | 0 ± 0       |     |
| 56               | 1487 ± 161    |     | 5392 ± 1571   |     | 0 ± 0        |     | 0 ± 0         |     | 0 ± 0       |     | 0 ± 0       |     | 0 ± 0       |     |
| 45               | 963 ± 483     |     | 1622 ± 344    |     | 0 ± 0        |     | 0 ± 0         |     | 0 ± 0       |     | 0 ± 0       |     | 0 ± 0       |     |
| 85               | 642 ± 207     |     | 1300 ± 208    |     | 0 ± 0        |     | 0 ± 0         |     | 0 ± 0       |     | 0 ± 0       |     | 0 ± 0       |     |
| 18               | 1148 ± 142    |     | 1082 ± 314    |     | 83 ± 61      |     | 101 ± 71      |     | 104 ± 102   |     | 193 ± 123   |     | 78 ± 16     |     |
| 43               | 961 ± 268     |     | 405 ± 137     |     | 0 ± 0        |     | 0 ± 0         |     | 0 ± 0       |     | 0 ± 0       |     | 0 ± 0       |     |
| 33               | 1082 ± 369    |     | 604 ± 229     |     | 133 ± 27     |     | 187 ± 97      |     | 279 ± 50    |     | 510 ± 46    |     | 166 ± 169   |     |
| 61               | 1477 ± 648    |     | 940 ± 253     |     | 370 ± 120    |     | 422 ± 89      |     | 267 ± 178   |     | 404 ± 166   |     | 206 ± 46    |     |
| 86               | 5902 ± 588    |     | 496 ± 130     |     | 0 ± 0        |     | 0 ± 0         |     | 0 ± 0       |     | 0 ± 0       |     | 0 ± 0       |     |
| 44               | 5293 ± 743    |     | 1556 ± 788    |     | 316 ± 191    |     | 509 ± 194     |     | 1188 ± 751  |     | 1982 ± 884  |     | 654 ± 406   |     |
| 87               | 12066 ± 229   |     | 2860 ± 201    |     | 921 ± 102    |     | 2413 ± 868    |     | 0 ± 0       |     | 5633 ± 1497 |     | 0 ± 0       |     |
| 65               | 4944 ± 448    |     | 2954 ± 1307   |     | 1682 ± 262   |     | 1638 ± 504    |     | 2760 ± 443  |     | 3438 ± 878  |     | 2185 ± 305  |     |
| 90               | 5118 ± 1229   |     | 3608 ± 954    |     | 2289 ± 504   |     | 2695 ± 286    |     | 3312 ± 614  |     | 3209 ± 255  |     | 2033 ± 640  |     |
| <b>Cluster 2</b> |               |     |               |     |              |     |               |     |             |     |             |     |             |     |
| 83               | 6097 ± 1333   |     | 0 ± 0         |     | 0 ± 0        |     | 0 ± 0         |     | 0 ± 0       |     | 0 ± 0       |     | 0 ± 0       |     |
| 36               | 5531 ± 859    |     | 0 ± 0         |     | 0 ± 0        |     | 0 ± 0         |     | 0 ± 0       |     | 0 ± 0       |     | 0 ± 0       |     |
| 35               | 2387 ± 326    |     | 0 ± 0         |     | 0 ± 0        |     | 0 ± 0         |     | 0 ± 0       |     | 0 ± 0       |     | 0 ± 0       |     |
| 52               | 1649 ± 300    |     | 0 ± 0         |     | 157 ± 54     |     | 95 ± 9        |     | 243 ± 76    |     | 149 ± 30    |     | 183 ± 35    |     |
| 75               | 1174 ± 219    |     | 230 ± 71      |     | 0 ± 0        |     | 0 ± 0         |     | 155 ± 170   |     | 0 ± 0       |     | 0 ± 0       |     |
| 81               | 827 ± 151     |     | 131 ± 136     |     | 60 ± 103     |     | 0 ± 0         |     | 113 ± 196   |     | 502 ± 93    |     | 0 ± 0       |     |
| 51               | 1399 ± 369    |     | 0 ± 0         |     | 252 ± 108    |     | 293 ± 112     |     | 525 ± 46    |     | 0 ± 0       |     | 128 ± 76    |     |
| 11               | 830 ± 196     |     | 140 ± 98      |     | 199 ± 78     |     | 161 ± 38      |     | 192 ± 68    |     | 236 ± 35    |     | 98 ± 30     |     |
| 49               | 1980 ± 259    |     | 219 ± 45      |     | 422 ± 104    |     | 464 ± 162     |     | 877 ± 85    |     | 1202 ± 241  |     | 774 ± 217   |     |
| <b>Cluster 3</b> |               |     |               |     |              |     |               |     |             |     |             |     |             |     |
| 48               | 0 ± 0         |     | 613 ± 74      |     | 0 ± 0        |     | 0 ± 0         |     | 0 ± 0       |     | 0 ± 0       |     | 0 ± 0       |     |
| <b>Cluster 4</b> |               |     |               |     |              |     |               |     |             |     |             |     |             |     |
| 27               | 205 ± 31      |     | 103 ± 30      |     | 1345 ± 259   |     | 1247 ± 213    |     | 868 ± 278   |     | 1065 ± 102  |     | 1190 ± 199  |     |
| 82               | 321 ± 103     |     | 171 ± 72      |     | 573 ± 198    |     | 831 ± 151     |     | 678 ± 243   |     | 1131 ± 11   |     | 1075 ± 381  |     |
| 4                | 502 ± 151     |     | 269 ± 279     |     | 1620 ± 597   |     | 1152 ± 78     |     | 2745 ± 529  |     | 1969 ± 197  |     | 998 ± 142   |     |
| 29               | 232 ± 94      |     | 137 ± 74      |     | 1054 ± 274   |     | 836 ± 186     |     | 894 ± 34    |     | 712 ± 122   |     | 1678 ± 105  |     |
| 2                | 0 ± 0         |     | 0 ± 0         |     | 760 ± 198    |     | 1164 ± 504    |     | 1826 ± 428  |     | 1211 ± 491  |     | 1049 ± 462  |     |
| 74               | 402 ± 329     |     | 229 ± 104     |     | 1304 ± 523   |     | 950 ± 385     |     | 2764 ± 474  |     | 1388 ± 46   |     | 1800 ± 167  |     |
| 80               | 0 ± 0         |     | 0 ± 0         |     | 1158 ± 105   |     | 526 ± 62      |     | 430 ± 261   |     | 1533 ± 120  |     | 295 ± 57    |     |
| 19               | 447 ± 93      |     | 302 ± 227     |     | 1407 ± 91    |     | 996 ± 407     |     | 1356 ± 173  |     | 835 ± 58    |     | 1065 ± 283  |     |
| 25               | 712 ± 196     |     | 286 ± 142     |     | 1271 ± 147   |     | 1204 ± 135    |     | 1004 ± 346  |     | 1137 ± 387  |     | 908 ± 134   |     |
| 3                | 493 ± 42      |     | 173 ± 168     |     | 1165 ± 193   |     | 1123 ± 131    |     | 1536 ± 340  |     | 1379 ± 205  |     | 1034 ± 254  |     |
| 38               | 480 ± 194     |     | 360 ± 132     |     | 1514 ± 553   |     | 1421 ± 164    |     | 1489 ± 276  |     | 903 ± 165   |     | 2717 ± 186  |     |
| 7                | 348 ± 135     |     | 247 ± 200     |     | 1459 ± 310   |     | 960 ± 62      |     | 1439 ± 355  |     | 1584 ± 194  |     | 1078 ± 512  |     |
| 1                | 1786 ± 383    |     | 621 ± 103     |     | 3457 ± 1292  |     | 4240 ± 679    |     | 2631 ± 307  |     | 3363 ± 844  |     | 3247 ± 114  |     |
| 57               | 541 ± 146     |     | 839 ± 115     |     | 1892 ± 55    |     | 1873 ± 276    |     | 947 ± 165   |     | 2338 ± 771  |     | 1622 ± 144  |     |
| 62               | 1577 ± 401    |     | 941 ± 366     |     | 5110 ± 524   |     | 4457 ± 942    |     | 2496 ± 478  |     | 3001 ± 198  |     | 3371 ± 953  |     |
| 37               | 1023 ± 578    |     | 1142 ± 346    |     | 5187 ± 2040  |     | 4679 ± 1056   |     | 4542 ± 418  |     | 2561 ± 318  |     | 6834 ± 1076 |     |
| 94               | 1289 ± 118    |     | 762 ± 265     |     | 3771 ± 1071  |     | 4226 ± 1437   |     | 2843 ± 1079 |     | 7838 ± 1895 |     | 5482 ± 2619 |     |
| 9                | 2161 ± 391    |     | 1537 ± 413    |     | 9195 ± 792   |     | 7712 ± 659    |     | 4866 ± 126  |     | 9910 ± 2890 |     | 5024 ± 297  |     |
| <b>Cluster 5</b> |               |     |               |     |              |     |               |     |             |     |             |     |             |     |
| 72               | 846 ± 65      |     | 441 ± 79      |     | 234 ± 148    |     | 186 ± 56      |     | 1534 ± 21   |     | 276 ± 82    |     | 0 ± 0       |     |
| 34               | 644 ± 32      |     | 677 ± 105     |     | 600 ± 260    |     | 759 ± 152     |     | 326 ± 177   |     | 411 ± 122   |     | 0 ± 0       |     |
| 60               | 3360 ± 216    |     | 305 ± 109     |     | 526 ± 152    |     | 748 ± 58      |     | 684 ± 202   |     | 636 ± 135   |     | 0 ± 0       |     |
| 59               | 3376 ± 337    |     | 699 ± 337     |     | 1007 ± 244   |     | 1539 ± 292    |     | 2050 ± 173  |     | 970 ± 215   |     | 217 ± 51    |     |

| Spot No.          | Small Int. |        | Large Int. |        | Caco-2 5d |        | Caco-2 15d |        | HT-29 |        | Hep G2 |        | TE 671 |        |
|-------------------|------------|--------|------------|--------|-----------|--------|------------|--------|-------|--------|--------|--------|--------|--------|
|                   | Av         | St Dev | Av         | St Dev | Av        | St Dev | Av         | St Dev | Av    | St Dev | Av     | St Dev | Av     | St Dev |
| 79                | 2649       | ± 653  | 1369       | ± 675  | 1693      | ± 411  | 1047       | ± 290  | 1828  | ± 519  | 791    | ± 100  | 70     | ± 46   |
| 17                | 3970       | ± 1103 | 654        | ± 312  | 3156      | ± 389  | 2936       | ± 386  | 3932  | ± 1726 | 1699   | ± 131  | 0      | ± 0    |
| 78                | 6962       | ± 1480 | 3410       | ± 1747 | 5191      | ± 308  | 6006       | ± 259  | 4175  | ± 722  | 4161   | ± 2210 | 1602   | ± 756  |
| <b>Cluster 6</b>  |            |        |            |        |           |        |            |        |       |        |        |        |        |        |
| 8                 | 0          | ± 0    | 0          | ± 0    | 0         | ± 0    | 0          | ± 0    | 0     | ± 0    | 0      | ± 0    | 3856   | ± 237  |
| 84                | 340        | ± 142  | 1695       | ± 594  | 0         | ± 0    | 617        | ± 575  | 0     | ± 0    | 610    | ± 90   | 3258   | ± 356  |
| 54                | 664        | ± 238  | 914        | ± 500  | 95        | ± 126  | 289        | ± 100  | 1385  | ± 146  | 326    | ± 96   | 3724   | ± 860  |
| 6                 | 84         | ± 100  | 147        | ± 96   | 179       | ± 40   | 109        | ± 51   | 821   | ± 98   | 182    | ± 7    | 1397   | ± 126  |
| <b>Cluster 7</b>  |            |        |            |        |           |        |            |        |       |        |        |        |        |        |
| 32                | 2027       | ± 468  | 541        | ± 13   | 1219      | ± 185  | 1017       | ± 345  | 678   | ± 105  | 0      | ± 0    | 0      | ± 0    |
| 16                | 2242       | ± 517  | 367        | ± 164  | 342       | ± 64   | 717        | ± 273  | 483   | ± 104  | 0      | ± 0    | 0      | ± 0    |
| 10                | 1742       | ± 282  | 714        | ± 239  | 411       | ± 102  | 444        | ± 201  | 278   | ± 95   | 0      | ± 0    | 0      | ± 0    |
| 64                | 4465       | ± 329  | 2849       | ± 2007 | 4928      | ± 1065 | 4361       | ± 224  | 6448  | ± 584  | 0      | ± 0    | 886    | ± 109  |
| <b>Cluster 8</b>  |            |        |            |        |           |        |            |        |       |        |        |        |        |        |
| 23                | 359        | ± 70   | 127        | ± 63   | 408       | ± 114  | 363        | ± 87   | 163   | ± 25   | 212    | ± 30   | 135    | ± 70   |
| 50                | 829        | ± 129  | 0          | ± 0    | 481       | ± 77   | 464        | ± 10   | 0     | ± 0    | 117    | ± 17   | 0      | ± 0    |
| 28                | 1324       | ± 179  | 87         | ± 27   | 471       | ± 116  | 541        | ± 217  | 125   | ± 57   | 322    | ± 128  | 112    | ± 35   |
| 26                | 1288       | ± 123  | 296        | ± 149  | 1269      | ± 167  | 1107       | ± 58   | 191   | ± 121  | 314    | ± 64   | 383    | ± 144  |
| 66                | 2682       | ± 627  | 129        | ± 48   | 792       | ± 156  | 1015       | ± 333  | 113   | ± 32   | 321    | ± 18   | 210    | ± 36   |
| <b>Cluster 9</b>  |            |        |            |        |           |        |            |        |       |        |        |        |        |        |
| 22                | 100        | ± 2    | 0          | ± 0    | 822       | ± 187  | 738        | ± 105  | 195   | ± 130  | 200    | ± 81   | 141    | ± 35   |
| 14                | 575        | ± 160  | 738        | ± 141  | 2436      | ± 730  | 2308       | ± 406  | 335   | ± 9    | 519    | ± 115  | 921    | ± 252  |
| 70                | 273        | ± 178  | 325        | ± 196  | 3362      | ± 337  | 2978       | ± 746  | 437   | ± 223  | 1319   | ± 254  | 1320   | ± 602  |
| 53                | 2352       | ± 730  | 764        | ± 467  | 4625      | ± 583  | 5403       | ± 568  | 2557  | ± 360  | 1533   | ± 310  | 1837   | ± 221  |
| 39                | 2072       | ± 607  | 1016       | ± 612  | 4939      | ± 1542 | 5210       | ± 1386 | 1135  | ± 257  | 1621   | ± 605  | 1869   | ± 182  |
| 20                | 1006       | ± 236  | 683        | ± 328  | 3685      | ± 1380 | 3886       | ± 1360 | 1674  | ± 265  | 1751   | ± 592  | 1857   | ± 563  |
| 55                | 1553       | ± 581  | 800        | ± 379  | 3450      | ± 477  | 3543       | ± 682  | 1981  | ± 59   | 2076   | ± 364  | 2164   | ± 181  |
| 5                 | 1647       | ± 756  | 1192       | ± 368  | 3250      | ± 332  | 3253       | ± 330  | 1753  | ± 419  | 2144   | ± 774  | 1854   | ± 682  |
| 40                | 2216       | ± 1047 | 2842       | ± 1153 | 5583      | ± 1244 | 7011       | ± 1078 | 652   | ± 136  | 621    | ± 136  | 676    | ± 434  |
| <b>Cluster 10</b> |            |        |            |        |           |        |            |        |       |        |        |        |        |        |
| 73                | 180        | ± 41   | 0          | ± 0    | 188       | ± 98   | 132        | ± 24   | 764   | ± 126  | 312    | ± 37   | 65     | ± 61   |
| 71                | 993        | ± 137  | 399        | ± 97   | 284       | ± 105  | 189        | ± 53   | 1354  | ± 182  | 730    | ± 122  | 546    | ± 175  |
| 69                | 1454       | ± 113  | 1070       | ± 265  | 254       | ± 52   | 283        | ± 32   | 1311  | ± 111  | 1211   | ± 252  | 474    | ± 122  |
| 24                | 1684       | ± 429  | 696        | ± 229  | 312       | ± 91   | 362        | ± 141  | 1838  | ± 358  | 988    | ± 113  | 254    | ± 159  |
| 63                | 1295       | ± 52   | 431        | ± 293  | 606       | ± 138  | 442        | ± 56   | 1418  | ± 202  | 815    | ± 172  | 1966   | ± 216  |
| 91                | 5044       | ± 2137 | 5052       | ± 2879 | 1526      | ± 853  | 1134       | ± 127  | 5025  | ± 2336 | 3472   | ± 293  | 5665   | ± 1125 |
| 42                | 2922       | ± 1120 | 2045       | ± 437  | 1967      | ± 766  | 1795       | ± 202  | 3655  | ± 1502 | 3292   | ± 187  | 3799   | ± 1172 |
| <b>Cluster 11</b> |            |        |            |        |           |        |            |        |       |        |        |        |        |        |
| 30                | 206        | ± 5    | 218        | ± 78   | 116       | ± 15   | 52         | ± 12   | 147   | ± 35   | 392    | ± 68   | 102    | ± 25   |
| 67                | 238        | ± 137  | 593        | ± 400  | 323       | ± 123  | 579        | ± 295  | 0     | ± 0    | 2081   | ± 222  | 0      | ± 0    |
| 77                | 1392       | ± 446  | 293        | ± 94   | 327       | ± 301  | 398        | ± 156  | 287   | ± 413  | 1524   | ± 419  | 362    | ± 138  |
| 13                | 1333       | ± 466  | 353        | ± 16   | 745       | ± 399  | 864        | ± 160  | 160   | ± 88   | 1540   | ± 63   | 597    | ± 367  |
| 76                | 3226       | ± 671  | 477        | ± 153  | 1885      | ± 1432 | 1421       | ± 355  | 204   | ± 208  | 3674   | ± 605  | 1832   | ± 984  |
| 41                | 2853       | ± 492  | 0          | ± 0    | 782       | ± 315  | 767        | ± 136  | 1015  | ± 110  | 5136   | ± 1614 | 632    | ± 372  |
| 58                | 1655       | ± 300  | 1724       | ± 949  | 1659      | ± 599  | 2013       | ± 400  | 547   | ± 106  | 1907   | ± 341  | 701    | ± 186  |
| <b>Cluster 12</b> |            |        |            |        |           |        |            |        |       |        |        |        |        |        |
| 15                | 1477       | ± 511  | 750        | ± 622  | 1491      | ± 566  | 1638       | ± 457  | 705   | ± 233  | 645    | ± 94   | 1456   | ± 673  |
| 46                | 1583       | ± 291  | 1118       | ± 338  | 1401      | ± 305  | 1001       | ± 142  | 1374  | ± 76   | 1723   | ± 356  | 988    | ± 527  |
| 47                | 2808       | ± 651  | 1573       | ± 461  | 1866      | ± 547  | 2091       | ± 79   | 2286  | ± 354  | 2204   | ± 581  | 1160   | ± 510  |
| 68                | 2008       | ± 269  | 882        | ± 485  | 2336      | ± 616  | 1991       | ± 546  | 1422  | ± 508  | 2288   | ± 308  | 1816   | ± 181  |
| 31                | 2654       | ± 265  | 2416       | ± 640  | 1486      | ± 267  | 1936       | ± 869  | 2770  | ± 79   | 3813   | ± 1061 | 1870   | ± 1051 |
| 88                | 4147       | ± 852  | 3016       | ± 1132 | 2309      | ± 1069 | 1850       | ± 640  | 4607  | ± 158  | 3484   | ± 657  | 4699   | ± 1613 |
| 89                | 5761       | ± 973  | 4843       | ± 1297 | 3906      | ± 1507 | 3279       | ± 551  | 6042  | ± 1276 | 4988   | ± 1067 | 5475   | ± 854  |
| 12                | 5985       | ± 1266 | 4567       | ± 1899 | 6100      | ± 696  | 4908       | ± 1409 | 5302  | ± 695  | 4459   | ± 1675 | 7144   | ± 1559 |
